# Supplementary material for: Trend dynamics of gout prevalence among the Chinese population, 1990-2019: A joinpoint and age-period-cohort analysis
Source: PubMed Central journal article supplement (PMC9602928; doi:10.3389/fpubh.2022.1008598), 2022-10-12
Supplement: Data_Sheet_1.pdf [file Data_Sheet_1.pdf]

**Supplementary Table 1. Gout prevalence in China during 1990-2019**

| Year | CPR(95%UI)        |                    |                 | ASPR(95%UI)      |                    |                 |
|------|-------------------|--------------------|-----------------|------------------|--------------------|-----------------|
|      | Both(‰)           | Men(‰)             | Women(‰)        | Both(‰)          | Men(‰)             | Women(‰)        |
| 1990 | 4.95(3.92-6.16)   | 7.38(5.79-9.19)    | 2.38(1.87-2.99) | 6.25(4.98-7.77)  | 9.54(7.63-11.80)   | 3.03(2.41-3.80) |
| 1991 | 4.94(3.91-6.14)   | 7.33(5.76-9.12)    | 2.40(1.89-3.01) | 6.14(4.90-7.62)  | 9.34(7.47-11.54)   | 3.01(2.39-3.77) |
| 1992 | 4.94(3.92-6.14)   | 7.31(5.75-9.08)    | 2.42(1.91-3.03) | 6.04(4.83-7.49)  | 9.17(7.34-11.31)   | 2.98(2.37-3.72) |
| 1993 | 4.96(3.93-6.16)   | 7.33(5.78-9.11)    | 2.44(1.92-3.05) | 5.97(4.77-7.38)  | 9.04(7.23-11.15)   | 2.96(2.35-3.70) |
| 1994 | 5.01(3.97-6.22)   | 7.39(5.85-9.19)    | 2.46(1.94-3.08) | 5.91(4.73-7.31)  | 8.95(7.17-11.04)   | 2.93(2.32-3.67) |
| 1995 | 5.08(4.03-6.30)   | 7.50(5.94-9.33)    | 2.49(1.97-3.11) | 5.89(4.71-7.28)  | 8.92(7.15-11.01)   | 2.91(2.30-3.65) |
| 1996 | 5.18(4.11-6.42)   | 7.66(6.07-9.53)    | 2.52(2.00-3.15) | 5.89(4.71-7.26)  | 8.93(7.16-11.02)   | 2.89(2.29-3.62) |
| 1997 | 5.30(4.20-6.57)   | 7.87(6.24-9.77)    | 2.55(2.02-3.19) | 5.90(4.72-7.29)  | 8.98(7.20-11.06)   | 2.86(2.27-3.59) |
| 1998 | 5.43(4.31-6.72)   | 8.10(6.43-10.02)   | 2.58(2.04-3.24) | 5.92(4.74-7.29)  | 9.05(7.25-11.12)   | 2.84(2.25-3.55) |
| 1999 | 5.58(4.43-6.90)   | 8.36(6.62-10.31)   | 2.62(2.07-3.29) | 5.95(4.77-7.31)  | 9.12(7.31-11.17)   | 2.82(2.24-3.53) |
| 2000 | 5.73(4.55-7.08)   | 8.61(6.81-10.59)   | 2.67(2.11-3.35) | 5.98(4.79-7.34)  | 9.19(7.37-11.23)   | 2.81(2.23-3.53) |
| 2001 | 5.92(4.70-7.30)   | 8.87(7.03-10.93)   | 2.77(2.20-3.48) | 6.04(4.84-7.43)  | 9.26(7.42-11.30)   | 2.87(2.27-3.60) |
| 2002 | 6.15(4.89-7.59)   | 9.17(7.28-11.27)   | 2.96(2.34-3.72) | 6.16(4.94-7.58)  | 9.36(7.48-11.42)   | 3.01(2.38-3.76) |
| 2003 | 6.42(5.11-7.91)   | 9.48(7.53-11.69)   | 3.19(2.52-4.02) | 6.30(5.06-7.76)  | 9.46(7.56-11.59)   | 3.19(2.53-4.00) |
| 2004 | 6.70(5.33-8.25)   | 9.80(7.77-12.07)   | 3.44(2.70-4.32) | 6.44(5.18-7.95)  | 9.56(7.63-11.75)   | 3.37(2.67-4.22) |
| 2005 | 6.95(5.54-8.59)   | 10.09(7.99-12.45)  | 3.65(2.88-4.59) | 6.56(5.26-8.07)  | 9.64(7.69-11.86)   | 3.51(2.77-4.39) |
| 2006 | 7.21(5.74-8.91)   | 10.40(8.24-12.83)  | 3.85(3.04-4.83) | 6.66(5.34-8.21)  | 9.73(7.79-11.97)   | 3.61(2.85-4.53) |
| 2007 | 7.49(5.98-9.28)   | 10.76(8.52-13.25)  | 4.06(3.20-5.09) | 6.77(5.43-8.38)  | 9.86(7.91-12.12)   | 3.72(2.94-4.68) |
| 2008 | 7.79(6.22-9.63)   | 11.14(8.83-13.76)  | 4.27(3.37-5.36) | 6.90(5.52-8.54)  | 10.02(8.04-12.33)  | 3.82(3.01-4.81) |
| 2009 | 8.10(6.46-10.04)  | 11.56(9.17-14.34)  | 4.47(3.52-5.63) | 7.02(5.61-8.70)  | 10.19(8.18-12.55)  | 3.90(3.07-4.90) |
| 2010 | 8.40(6.69-10.40)  | 12.00(9.53-14.93)  | 4.63(3.64-5.83) | 7.13(5.71-8.83)  | 10.38(8.33-12.79)  | 3.94(3.10-4.95) |
| 2011 | 8.70(6.92-10.79)  | 12.48(9.92-15.51)  | 4.73(3.72-5.95) | 7.22(5.78-8.93)  | 10.59(8.50-13.04)  | 3.92(3.10-4.93) |
| 2012 | 9.00(7.16-11.18)  | 13.01(10.32-16.15) | 4.79(3.75-6.03) | 7.31(5.84-9.02)  | 10.83(8.69-13.35)  | 3.87(3.06-4.86) |
| 2013 | 9.32(7.42-11.61)  | 13.61(10.81-16.87) | 4.83(3.79-6.08) | 7.41(5.92-9.16)  | 11.11(8.92-13.74)  | 3.80(3.00-4.77) |
| 2014 | 9.70(7.72-12.12)  | 14.32(11.37-17.80) | 4.89(3.83-6.19) | 7.54(6.03-9.34)  | 11.46(9.19-14.16)  | 3.74(2.96-4.70) |
| 2015 | 10.16(8.08-12.67) | 15.12(12.04-18.90) | 4.99(3.90-6.33) | 7.74(6.18-9.60)  | 11.88(9.53-14.66)  | 3.73(2.95-4.69) |
| 2016 | 11.00(8.73-13.81) | 16.57(13.14-20.7)  | 5.19(4.07-6.57) | 8.22(6.55-10.15) | 12.80(10.28-15.76) | 3.79(3.01-4.76) |
| 2017 | 11.72(9.27-14.77) | 17.76(14.01-22.23) | 5.43(4.25-6.85) | 8.59(6.82-10.66) | 13.50(10.80-16.65) | 3.87(3.08-4.86) |
| 2018 | 11.77(9.34-14.80) | 17.69(14.01-22.22) | 5.62(4.39-7.13) | 8.47(6.75-10.48) | 13.22(10.55-16.29) | 3.92(3.10-4.92) |
| 2019 | 11.36(9.00-14.31) | 16.70(13.26-20.93) | 5.81(4.54-7.40) | 8.03(6.42-9.94)  | 12.31(9.80-15.22)  | 3.95(3.12-4.97) |

**Supplementary Table 2. APCs and AAPCs of gout prevalence of gout in China during 1990-2019**

| Segments      | Age-standardized prevalence |                 |         | Crude prevalence |                 |         |
|---------------|-----------------------------|-----------------|---------|------------------|-----------------|---------|
|               | Year                        | APC (95% CI)    | p-value | Year             | APC (95% CI)    | p-value |
| <b>Both</b>   |                             |                 |         |                  |                 |         |
| Trend 1       | 1990-1994                   | -1.4(-1.7~-1.2) | <0.001  | 1990-1994        | 0.1(-0.1~0.4)   | 0.233   |
| Trend 2       | 1994-2000                   | 0.2(0.0~0.4)    | 0.022   | 1994-2000        | 2.3(2.1~2.5)    | <0.001  |
| Trend 3       | 2000-2009                   | 1.9(1.8~2.0)    | <0.001  | 2000-2009        | 4.0(3.9~4.1)    | <0.001  |
| Trend 4       | 2009-2014                   | 1.2(1.0~1.5)    | <0.001  | 2009-2014        | 3.5(3.2~3.7)    | <0.001  |
| Trend 5       | 2014-2017                   | 4.8(4.0~5.6)    | <0.001  | 2014-2017        | 6.9(6.0~7.7)    | <0.001  |
| Trend 6       | 2017-2019                   | -3.1(-3.8~-2.3) | <0.001  | 2017-2019        | -1.3(-2.0~-0.6) | 0.002   |
| AAPC          | 1990-2019                   | 0.9(0.8~1.0)    | <0.001  | 1990-2019        | 2.9(2.8~3.0)    | <0.001  |
| <b>Male</b>   |                             |                 |         |                  |                 |         |
| Trend 1       | 1990-1995                   | -1.4(-1.6~-1.2) | <0.001  | 1990-1995        | 0.2(0.0~0.4)    | 0.062   |
| Trend 2       | 1995-2007                   | 0.9(0.8~0.9)    | <0.001  | 1995-2008        | 3.1(3.1~3.2)    | <0.001  |
| Trend 3       | 2007-2014                   | 2.1(1.9~2.2)    | <0.001  | 2008-2014        | 4.2(4.0~4.4)    | <0.001  |
| Trend 4       | 2014-2017                   | 6.3(5.3~7.2)    | <0.001  | 2014-2017        | 8.1(7.0~9.1)    | <0.001  |
| Trend 5       | 2017-2019                   | -4.4(-5.3~-3.5) | <0.001  | 2017-2019        | -2.9(-3.8~-1.9) | <0.001  |
| AAPC          | 1990-2019                   | 0.9(0.8~1.1)    | <0.001  | 1990-2019        | 2.9(2.8~3.1)    | <0.001  |
| <b>Female</b> |                             |                 |         |                  |                 |         |
| Trend 1       | 1990-1998                   | -0.9(-0.9~-0.8) | <0.001  | 1990-1998        | 1.0(0.9~1.1)    | <0.001  |
| Trend 2       | 1998-2001                   | 0.2(-0.5~1.0)   | 0.547   | 1998-2001        | 2.4(1.6~3.2)    | <0.001  |
| Trend 3       | 2001-2005                   | 5.6(5.2~6.0)    | <0.001  | 2001-2005        | 7.4(7.0~7.9)    | <0.001  |
| Trend 4       | 2005-2010                   | 2.3(2.1~2.6)    | <0.001  | 2005-2010        | 4.9(4.6~5.1)    | <0.001  |
| Trend 5       | 2010-2015                   | -1.3(-1.5~-1.0) | <0.001  | 2010-2015        | 1.3(1.1~1.6)    | <0.001  |
| Trend 6       | 2015-2019                   | 1.7(1.4~1.9)    | <0.001  | 2015-2019        | 4.0(3.8~4.3)    | <0.001  |
| AAPC          | 1990-2019                   | 0.9(0.8~1.0)    | <0.001  | 1990-2019        | 3.2(3.0~3.3)    | <0.001  |

APCs, annual percent changes; AAPCs, average annual percent changes.

**Supplementary Table 3. Age, period and cohort effects of gout prevalence in China**

| Factors        | Effect coefficient | Standard error | Z value | p-value | 95% CI |        |
|----------------|--------------------|----------------|---------|---------|--------|--------|
|                |                    |                |         |         | Lower  | Upper  |
| <b>Age</b>     |                    |                |         |         |        |        |
| 15-19          | -4.108             | 0.171          | -24.040 | <0.001  | -4.443 | -3.773 |
| 20-24          | -2.004             | 0.058          | -34.810 | <0.001  | -2.117 | -1.891 |
| 25-29          | -0.845             | 0.038          | -22.190 | <0.001  | -0.920 | -0.771 |
| 30-34          | -0.244             | 0.032          | -7.750  | <0.001  | -0.306 | -0.183 |
| 35-39          | 0.127              | 0.027          | 4.620   | <0.001  | 0.073  | 0.181  |
| 40-44          | 0.353              | 0.024          | 14.550  | <0.001  | 0.306  | 0.401  |
| 45-49          | 0.475              | 0.022          | 22.050  | <0.001  | 0.433  | 0.517  |
| 50-54          | 0.559              | 0.019          | 29.520  | <0.001  | 0.522  | 0.596  |
| 55-59          | 0.658              | 0.016          | 39.950  | <0.001  | 0.626  | 0.690  |
| 60-64          | 0.757              | 0.014          | 53.150  | <0.001  | 0.729  | 0.785  |
| 65-69          | 0.852              | 0.013          | 67.990  | <0.001  | 0.827  | 0.877  |
| 70-74          | 0.915              | 0.012          | 78.720  | <0.001  | 0.892  | 0.937  |
| 75-79          | 0.906              | 0.012          | 76.940  | <0.001  | 0.882  | 0.929  |
| 80-84          | 0.851              | 0.013          | 65.990  | <0.001  | 0.826  | 0.877  |
| 85-89          | 0.749              | 0.015          | 49.870  | <0.001  | 0.720  | 0.779  |
| <b>Period</b>  |                    |                |         |         |        |        |
| 1994           | -0.373             | 0.010          | -36.050 | <0.001  | -0.393 | -0.352 |
| 1999           | -0.290             | 0.008          | -36.220 | <0.001  | -0.305 | -0.274 |
| 2004           | -0.106             | 0.006          | -16.440 | <0.001  | -0.119 | -0.093 |
| 2009           | 0.091              | 0.006          | 14.560  | <0.001  | 0.079  | 0.104  |
| 2014           | 0.247              | 0.008          | 32.930  | <0.001  | 0.232  | 0.262  |
| 2019           | 0.430              | 0.009          | 46.270  | <0.001  | 0.412  | 0.448  |
| <b>Cohort</b>  |                    |                |         |         |        |        |
| 1905-1909      | 0.918              | 0.031          | 29.550  | <0.001  | 0.857  | 0.979  |
| 1910-1914      | 0.823              | 0.026          | 31.070  | <0.001  | 0.771  | 0.875  |
| 1915-1919      | 0.742              | 0.024          | 30.760  | <0.001  | 0.695  | 0.789  |
| 1920-1924      | 0.666              | 0.023          | 29.330  | <0.001  | 0.621  | 0.710  |
| 1925-1929      | 0.575              | 0.022          | 26.110  | <0.001  | 0.532  | 0.618  |
| 1930-1934      | 0.500              | 0.022          | 22.910  | <0.001  | 0.457  | 0.543  |
| 1935-1939      | 0.427              | 0.023          | 18.850  | <0.001  | 0.382  | 0.471  |
| 1940-1944      | 0.340              | 0.024          | 14.230  | <0.001  | 0.293  | 0.387  |
| 1945-1949      | 0.243              | 0.025          | 9.520   | <0.001  | 0.193  | 0.293  |
| 1950-1954      | 0.134              | 0.027          | 4.880   | <0.001  | 0.080  | 0.188  |
| 1955-1959      | 0.032              | 0.030          | 1.080   | 0.278   | -0.026 | 0.090  |
| 1960-1964      | -0.076             | 0.032          | -2.380  | 0.017   | -0.138 | -0.013 |
| 1965-1969      | -0.183             | 0.034          | -5.340  | <0.001  | -0.251 | -0.116 |
| 1970-1974      | -0.297             | 0.037          | -8.030  | <0.001  | -0.370 | -0.225 |
| 1975-1979      | -0.432             | 0.040          | -10.720 | <0.001  | -0.510 | -0.353 |
| 1980-1984      | -0.576             | 0.045          | -12.870 | <0.001  | -0.664 | -0.489 |
| 1985-1989      | -0.729             | 0.052          | -13.970 | <0.001  | -0.831 | -0.627 |
| 1990-1994      | -0.882             | 0.069          | -12.860 | <0.001  | -1.017 | -0.748 |
| 1995-1999      | -1.029             | 0.123          | -8.390  | <0.001  | -1.270 | -0.789 |
| 2000-2004      | -1.194             | 0.435          | -2.740  | 0.006   | -2.047 | -0.341 |
| Intercept      | 6.586              | 0.023          | 288.730 | <0.001  | 6.542  | 6.631  |
| Log likelihood | -403.872           |                |         |         |        |        |
| AIC            | 9.819              |                |         |         |        |        |
| BIC            | -187.389           |                |         |         |        |        |

**Supplementary Table 4. Age, period and cohort effects of gout prevalence in China (for men)**

| Factors        | Effect coefficient | Standard error | Z value | p-value | 95% CI |        |
|----------------|--------------------|----------------|---------|---------|--------|--------|
|                |                    |                |         |         | Lower  | Upper  |
| <b>Age</b>     |                    |                |         |         |        |        |
| 15-19          | -4.218             | 0.147          | -28.680 | <0.001  | -4.507 | -3.930 |
| 20-24          | -2.012             | 0.047          | -42.490 | <0.001  | -2.105 | -1.920 |
| 25-29          | -0.804             | 0.031          | -25.760 | <0.001  | -0.865 | -0.743 |
| 30-34          | -0.194             | 0.026          | -7.480  | <0.001  | -0.245 | -0.143 |
| 35-39          | 0.176              | 0.023          | 7.760   | <0.001  | 0.131  | 0.220  |
| 40-44          | 0.399              | 0.020          | 19.900  | <0.001  | 0.360  | 0.439  |
| 45-49          | 0.511              | 0.018          | 28.650  | <0.001  | 0.476  | 0.546  |
| 50-54          | 0.582              | 0.016          | 37.010  | <0.001  | 0.552  | 0.613  |
| 55-59          | 0.660              | 0.014          | 48.030  | <0.001  | 0.633  | 0.687  |
| 60-64          | 0.740              | 0.012          | 61.880  | <0.001  | 0.716  | 0.763  |
| 65-69          | 0.821              | 0.011          | 77.830  | <0.001  | 0.800  | 0.842  |
| 70-74          | 0.875              | 0.010          | 89.640  | <0.001  | 0.856  | 0.895  |
| 75-79          | 0.866              | 0.010          | 88.270  | <0.001  | 0.847  | 0.885  |
| 80-84          | 0.825              | 0.011          | 77.540  | <0.001  | 0.804  | 0.845  |
| 85-89          | 0.774              | 0.012          | 63.180  | <0.001  | 0.750  | 0.798  |
| <b>Period</b>  |                    |                |         |         |        |        |
| 1994           | -0.356             | 0.008          | -42.090 | <0.001  | -0.373 | -0.340 |
| 1999           | -0.256             | 0.007          | -39.200 | <0.001  | -0.268 | -0.243 |
| 2004           | -0.128             | 0.005          | -23.920 | <0.001  | -0.139 | -0.118 |
| 2009           | 0.038              | 0.005          | 7.270   | <0.001  | 0.028  | 0.049  |
| 2014           | 0.254              | 0.006          | 41.250  | <0.001  | 0.242  | 0.266  |
| 2019           | 0.448              | 0.008          | 58.790  | <0.001  | 0.433  | 0.462  |
| <b>Cohort</b>  |                    |                |         |         |        |        |
| 1905-1909      | 0.941              | 0.026          | 36.580  | <0.001  | 0.891  | 0.992  |
| 1910-1914      | 0.843              | 0.022          | 37.930  | <0.001  | 0.800  | 0.887  |
| 1915-1919      | 0.748              | 0.020          | 36.510  | <0.001  | 0.708  | 0.788  |
| 1920-1924      | 0.651              | 0.019          | 33.490  | <0.001  | 0.613  | 0.689  |
| 1925-1929      | 0.548              | 0.019          | 28.920  | <0.001  | 0.511  | 0.585  |
| 1930-1934      | 0.473              | 0.019          | 25.120  | <0.001  | 0.436  | 0.510  |
| 1935-1939      | 0.396              | 0.020          | 20.320  | <0.001  | 0.358  | 0.434  |
| 1940-1944      | 0.317              | 0.021          | 15.450  | <0.001  | 0.277  | 0.357  |
| 1945-1949      | 0.232              | 0.022          | 10.650  | <0.001  | 0.189  | 0.275  |
| 1950-1954      | 0.139              | 0.023          | 5.960   | <0.001  | 0.093  | 0.185  |
| 1955-1959      | 0.040              | 0.025          | 1.590   | 0.113   | -0.009 | 0.089  |
| 1960-1964      | -0.059             | 0.027          | -2.190  | 0.028   | -0.112 | -0.006 |
| 1965-1969      | -0.159             | 0.029          | -5.520  | <0.001  | -0.216 | -0.103 |
| 1970-1974      | -0.275             | 0.031          | -8.880  | <0.001  | -0.336 | -0.215 |
| 1975-1979      | -0.408             | 0.034          | -12.170 | <0.001  | -0.474 | -0.343 |
| 1980-1984      | -0.556             | 0.037          | -14.960 | <0.001  | -0.628 | -0.483 |
| 1985-1989      | -0.714             | 0.043          | -16.620 | <0.001  | -0.799 | -0.630 |
| 1990-1994      | -0.883             | 0.056          | -15.730 | <0.001  | -0.993 | -0.773 |
| 1995-1999      | -1.050             | 0.102          | -10.340 | <0.001  | -1.249 | -0.851 |
| 2000-2004      | -1.223             | 0.377          | -3.240  | 0.001   | -1.963 | -0.484 |
| Intercept      | 6.992              | 0.020          | 355.560 | <0.001  | 6.953  | 7.030  |
| Log likelihood | -446.739           |                |         |         |        |        |
| AIC            | 10.772             |                |         |         |        |        |
| BIC            | -138.071           |                |         |         |        |        |

**Supplementary Table 5. Age, period and cohort effects of gout prevalence in China (for women)**

| Factors        | Effect coefficient | Standard error | Z value | p-value | 95% CI |        |
|----------------|--------------------|----------------|---------|---------|--------|--------|
|                |                    |                |         |         | Lower  | Upper  |
| <b>Age</b>     |                    |                |         |         |        |        |
| 15-19          | -3.844             | 0.216          | -17.770 | <0.001  | -4.268 | -3.420 |
| 20-24          | -2.003             | 0.082          | -24.470 | <0.001  | -2.164 | -1.843 |
| 25-29          | -1.046             | 0.056          | -18.580 | <0.001  | -1.156 | -0.935 |
| 30-34          | -0.508             | 0.046          | -10.950 | <0.001  | -0.599 | -0.417 |
| 35-39          | -0.146             | 0.040          | -3.650  | <0.001  | -0.225 | -0.068 |
| 40-44          | 0.099              | 0.035          | 2.800   | <0.001  | 0.030  | 0.168  |
| 45-49          | 0.277              | 0.031          | 8.950   | <0.001  | 0.216  | 0.338  |
| 50-54          | 0.432              | 0.027          | 16.070  | <0.001  | 0.379  | 0.484  |
| 55-59          | 0.618              | 0.023          | 27.030  | <0.001  | 0.574  | 0.663  |
| 60-64          | 0.796              | 0.019          | 41.100  | <0.001  | 0.758  | 0.834  |
| 65-69          | 0.960              | 0.017          | 57.300  | <0.001  | 0.927  | 0.992  |
| 70-74          | 1.077              | 0.016          | 69.450  | <0.001  | 1.046  | 1.107  |
| 75-79          | 1.114              | 0.016          | 69.610  | <0.001  | 1.082  | 1.145  |
| 80-84          | 1.107              | 0.018          | 61.500  | <0.001  | 1.071  | 1.142  |
| 85-89          | 1.069              | 0.021          | 50.240  | <0.001  | 1.027  | 1.110  |
| <b>Period</b>  |                    |                |         |         |        |        |
| 1994           | -0.427             | 0.015          | -28.690 | <0.001  | -0.456 | -0.397 |
| 1999           | -0.375             | 0.011          | -33.250 | <0.001  | -0.397 | -0.353 |
| 2004           | -0.056             | 0.008          | -6.680  | <0.001  | -0.073 | -0.040 |
| 2009           | 0.208              | 0.008          | 25.610  | <0.001  | 0.192  | 0.224  |
| 2014           | 0.241              | 0.011          | 22.980  | <0.001  | 0.221  | 0.262  |
| 2019           | 0.409              | 0.013          | 30.510  | <0.001  | 0.383  | 0.436  |
| <b>Cohort</b>  |                    |                |         |         |        |        |
| 1905-1909      | 1.014              | 0.041          | 24.980  | <0.001  | 0.935  | 1.094  |
| 1910-1914      | 0.916              | 0.035          | 26.350  | <0.001  | 0.848  | 0.984  |
| 1915-1919      | 0.815              | 0.031          | 26.080  | <0.001  | 0.754  | 0.876  |
| 1920-1924      | 0.717              | 0.029          | 24.710  | <0.001  | 0.660  | 0.774  |
| 1925-1929      | 0.630              | 0.028          | 22.580  | <0.001  | 0.575  | 0.685  |
| 1930-1934      | 0.545              | 0.028          | 19.710  | <0.001  | 0.491  | 0.599  |
| 1935-1939      | 0.455              | 0.029          | 15.770  | <0.001  | 0.399  | 0.512  |
| 1940-1944      | 0.354              | 0.031          | 11.480  | <0.001  | 0.294  | 0.415  |
| 1945-1949      | 0.243              | 0.034          | 7.260   | <0.001  | 0.178  | 0.309  |
| 1950-1954      | 0.122              | 0.037          | 3.330   | 0.001   | 0.050  | 0.194  |
| 1955-1959      | -0.002             | 0.040          | -0.060  | 0.956   | -0.081 | 0.077  |
| 1960-1964      | -0.121             | 0.044          | -2.760  | 0.006   | -0.208 | -0.035 |
| 1965-1969      | -0.239             | 0.048          | -5.000  | <0.001  | -0.333 | -0.145 |
| 1970-1974      | -0.367             | 0.052          | -7.020  | <0.001  | -0.469 | -0.264 |
| 1975-1979      | -0.498             | 0.057          | -8.690  | <0.001  | -0.610 | -0.386 |
| 1980-1984      | -0.631             | 0.064          | -9.800  | <0.001  | -0.758 | -0.505 |
| 1985-1989      | -0.768             | 0.076          | -10.090 | <0.001  | -0.917 | -0.619 |
| 1990-1994      | -0.911             | 0.101          | -9.000  | <0.001  | -1.109 | -0.712 |
| 1995-1999      | -1.061             | 0.174          | -6.090  | <0.001  | -1.402 | -0.720 |
| 2000-2004      | -1.214             | 0.550          | -2.200  | 0.027   | -2.293 | -0.135 |
| Intercept      | 5.892              | 0.029          | 200.210 | <0.001  | 5.834  | 5.950  |
| Log likelihood | -394.335           |                |         |         |        |        |
| AIC            | 9.607              |                |         |         |        |        |
| BIC            | -143.458           |                |         |         |        |        |

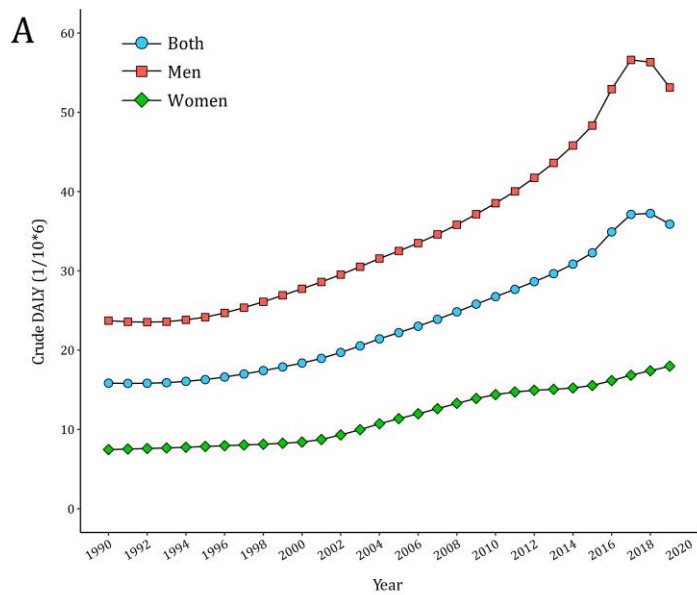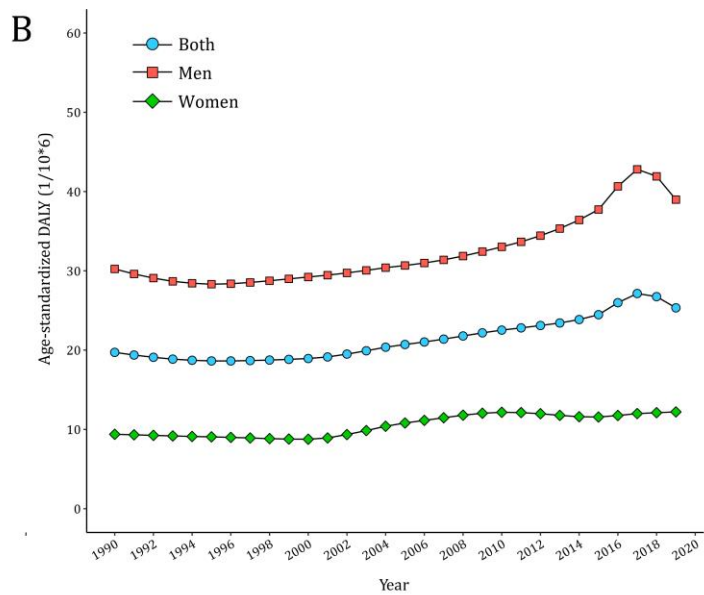

**Supplementary Figure 1. Trends of gout prevalence in China during 1990-2019**  
(A. crude DALY of gout; B. age-standardized DALY of gout)

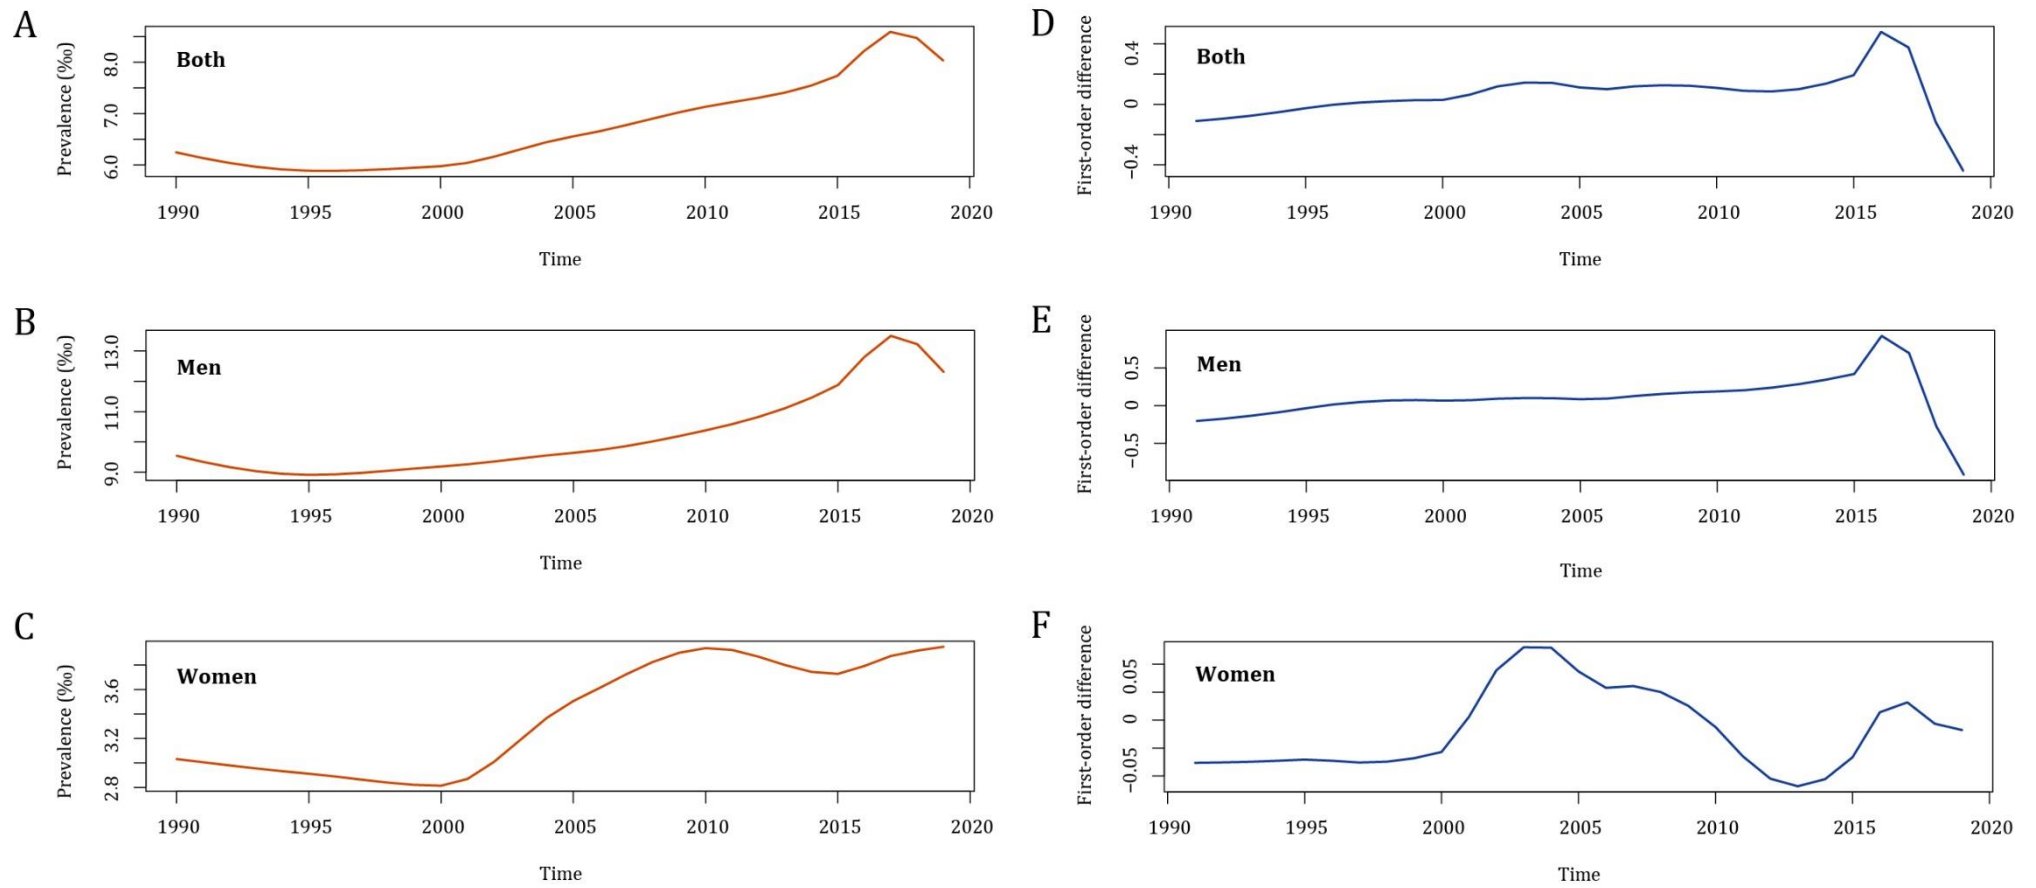

**Supplementary Figure 2. Timing diagram of gout prevalence (A-C: Age-standardized prevalence of gout; D-F: Age-standardized prevalence of gout after first-order differencing)**

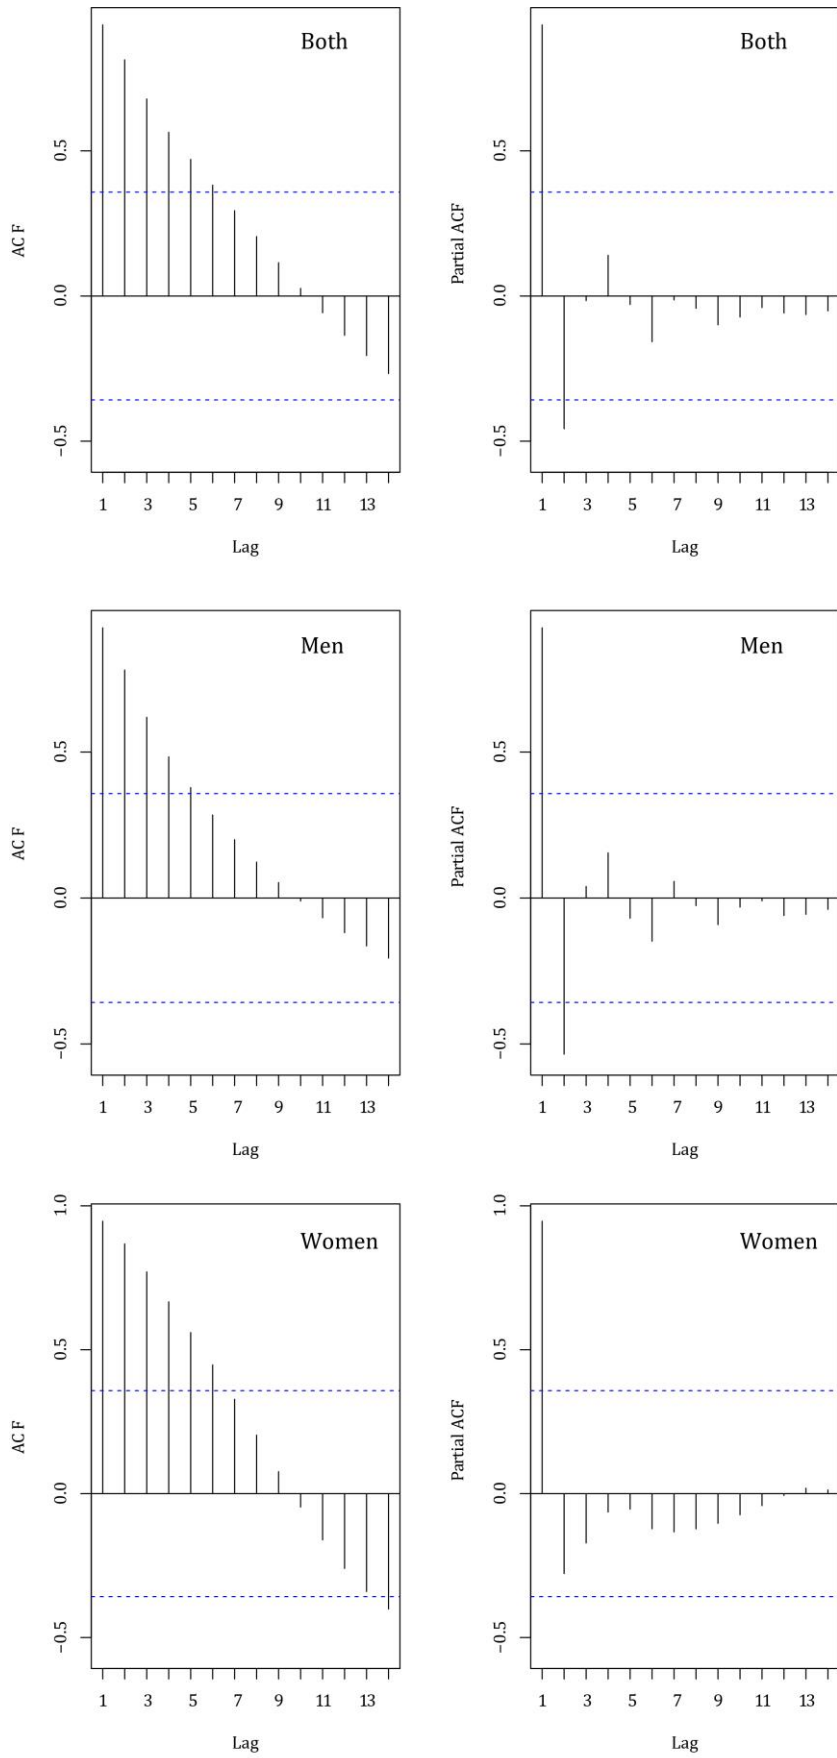

**Supplementary Figure 3. Autocorrelation function and partial autocorrelation function graphs of original data**



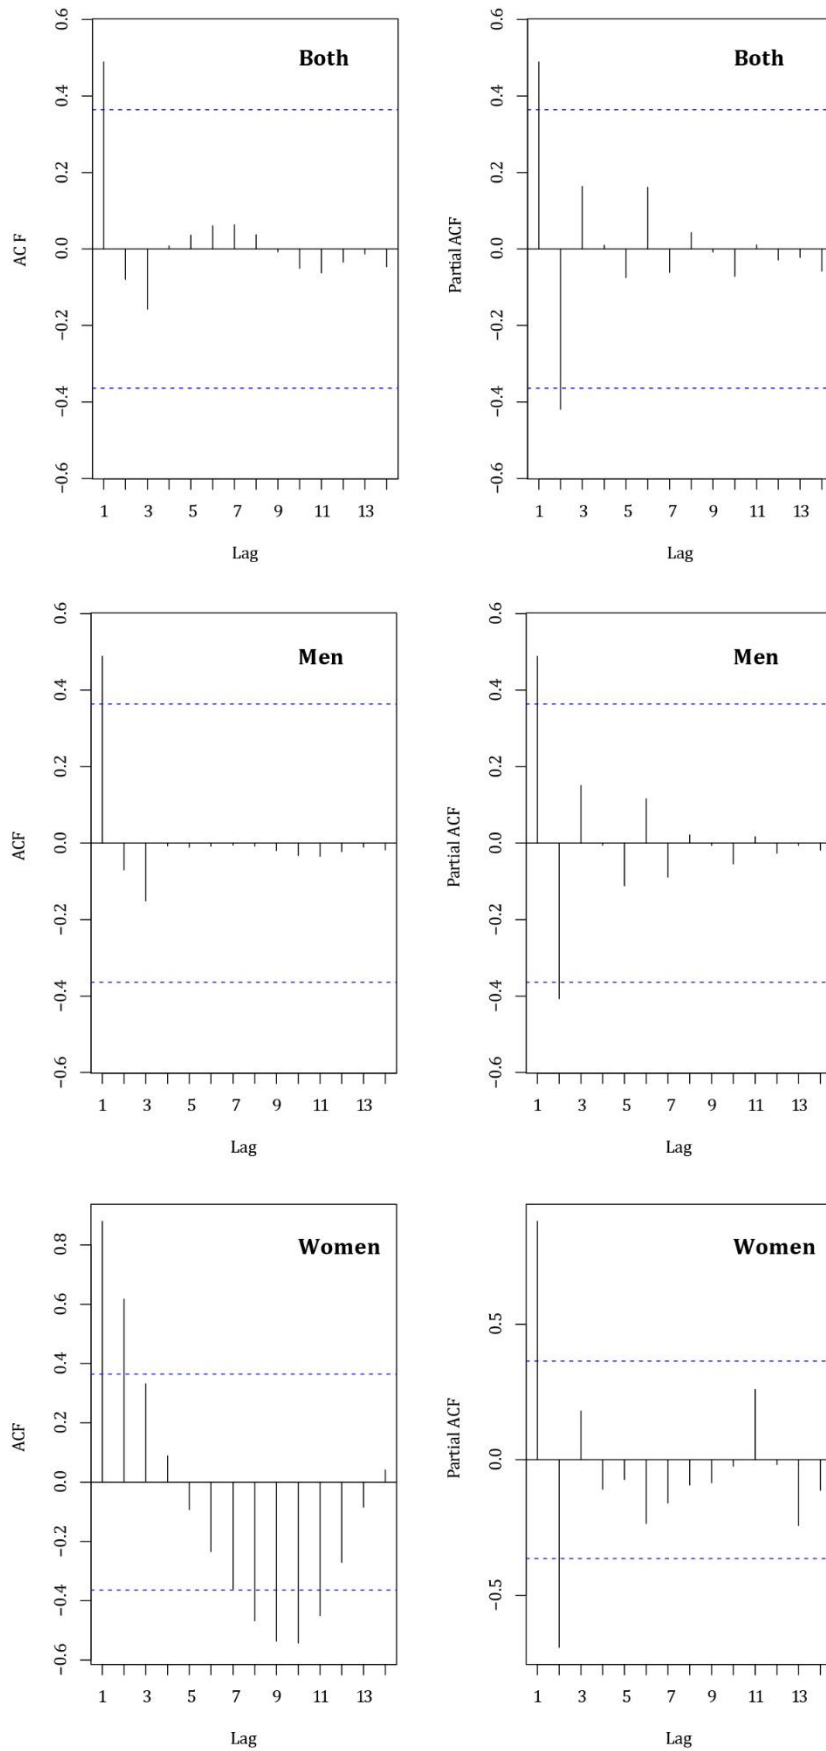

**Supplementary Figure 4. Autocorrelation function and partial autocorrelation function graphs after one order differencing**

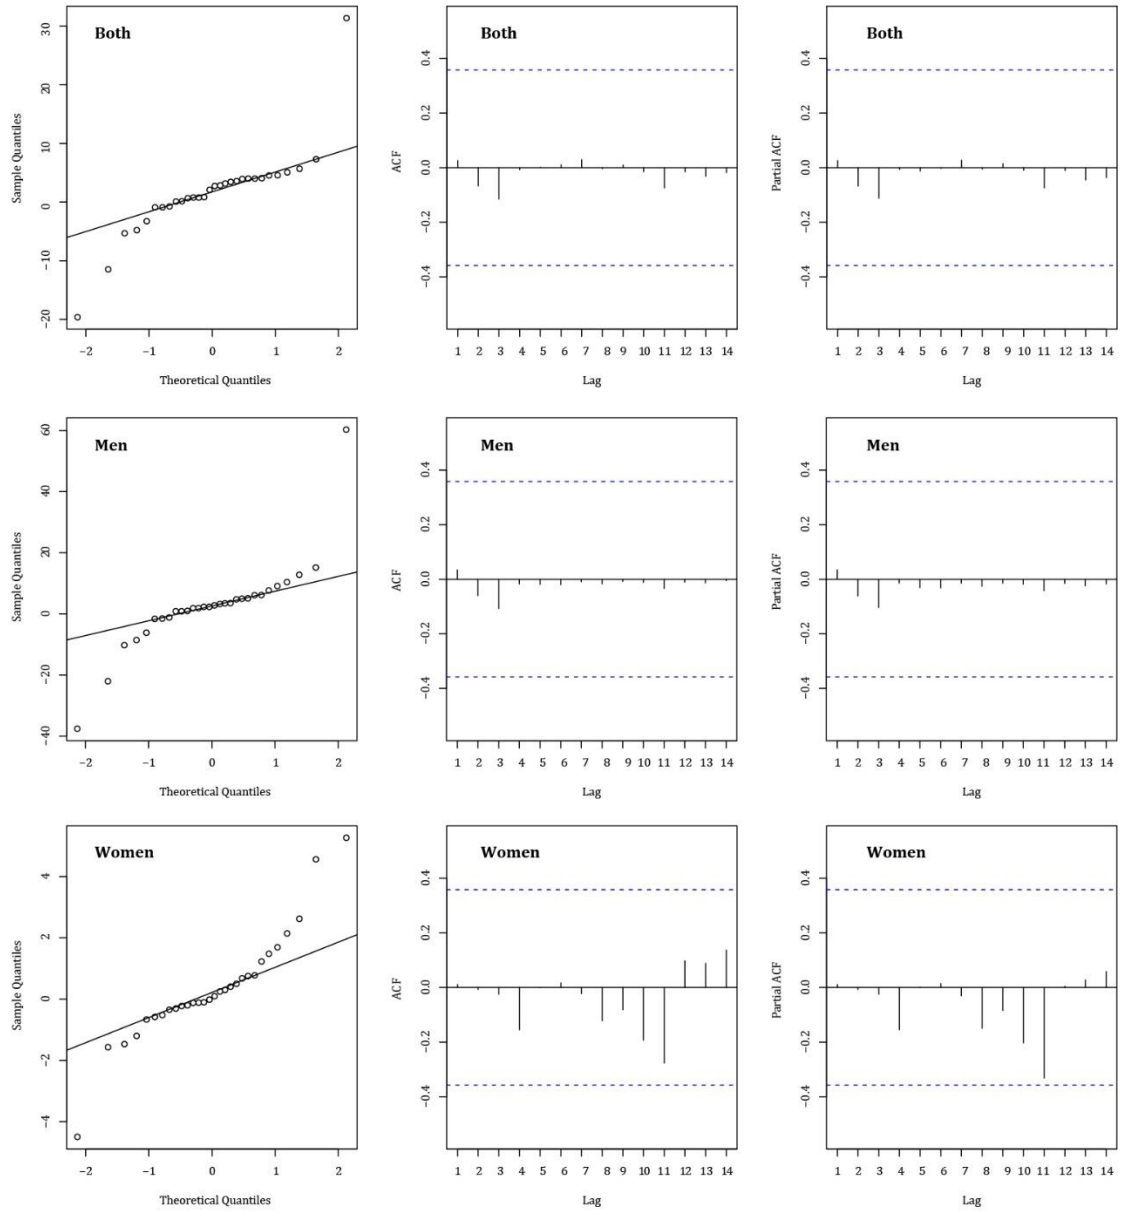

**Supplementary Figure 5. Residual Q-Q plots, autocorrelation function and partial autocorrelation graphs of ARIMA models**

**Supplementary Table 6. The white noise test for differential time series and ARIMA models**

|       | Differencing          |         | ARIMA models          |         |
|-------|-----------------------|---------|-----------------------|---------|
|       | Ljung-Box $\lambda^2$ | p-value | Ljung-Box $\lambda^2$ | p-value |
| Both  | 1.620                 | 0.203   | 0.023                 | 0.881   |
| Men   | 1.594                 | 0.207   | 0.040                 | 0.842   |
| Women | 2.607                 | 0.106   | 0.004                 | 0.949   |

**Supplementary Table 7. The predictive capacity of ARIMA models**

|       | ME    | RMSE   | MAE   | MPE   | MAPE  | MASE  |
|-------|-------|--------|-------|-------|-------|-------|
| Both  | 1.619 | 7.835  | 4.757 | 0.238 | 0.643 | 0.380 |
| Men   | 2.582 | 14.843 | 8.512 | 0.250 | 0.741 | 0.385 |
| Women | 0.361 | 1.794  | 1.157 | 0.116 | 0.335 | 0.189 |

ME: Mean Error, RMSE: Root Mean Squared Error, MAE: Mean Absolute Error, MPE: Mean Percentage Error, MAPE: Mean Absolute Percentage Error, MASE: Mean Absolute Scaled Error

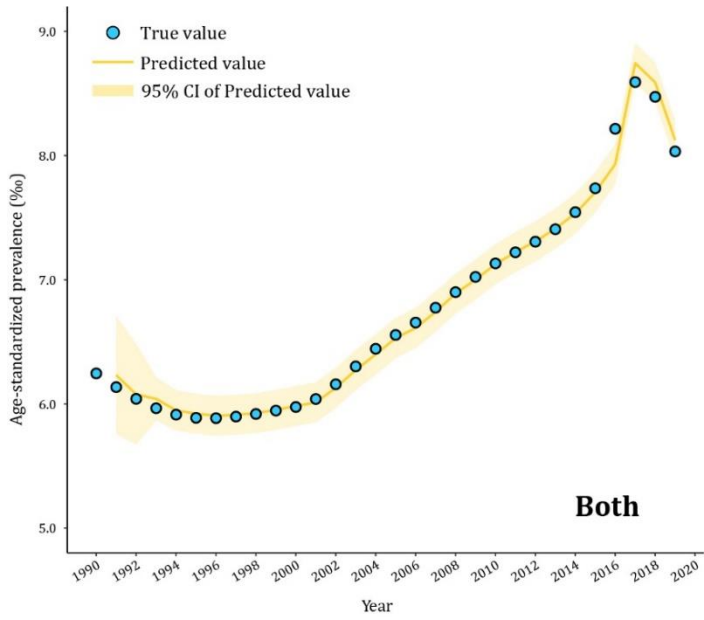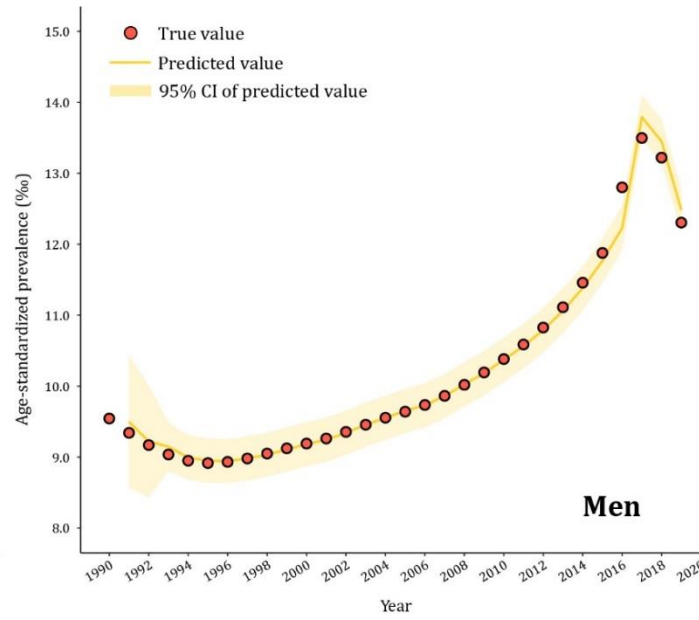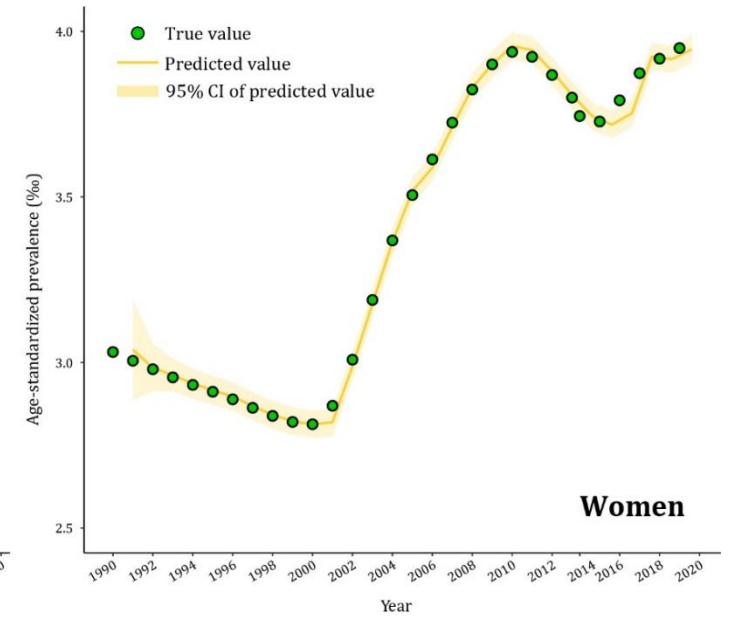

**Supplementary Figure 6. Comparison of the true and predicted values of age-standardized prevalence of gout in ARIMA models (the blue, red and green dot lines represent the true trend of age-standardized prevalence of gout; the yellow lines represent the predicted trend and the light-yellow shaded regions represent the 95% confidence interval of predicted values)**

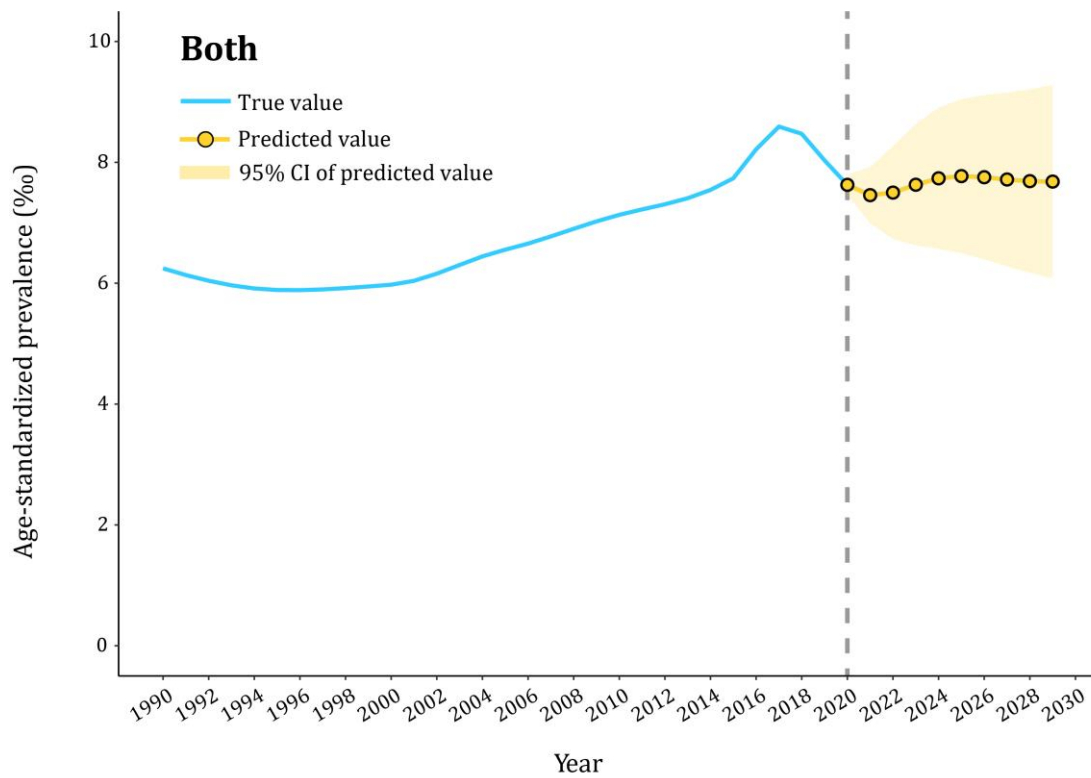

**Supplementary Figure 7. Predicted trends of gout prevalence in China over ten years (2020~2029)** (the yellow lines represent the predicted trend and the light-yellow shaded regions represent the 95% confidence interval of predicted values; the gray dot vertical line split data into true value (1990-2019) and predicted value (2020-2029))
